# Supplementary material for: mTOR inhibitors and risk of ovarian cysts: a systematic review and meta-analysis
Source: HighWire-hosted journal article supplement (doi:10.1136/bmjopen-2020-048190), 2021-09-01
Supplement: bmjopen-2020-048190supp001_data_supplement.pdf [file bmjopen-2020-048190supp001_data_supplement.pdf]

## Search Strategy

### PubMed/Medline

((("tacrolimus"[MeSH Terms] OR "tacrolimus"[All Fields] OR ("sirolimus"[MeSH Terms] OR "sirolimus"[All Fields]) OR ("everolimus"[MeSH Terms] OR "everolimus"[All Fields]) OR ("ridaforolimus"[Supplementary Concept] OR "ridaforolimus"[All Fields] OR "deforolimus"[All Fields]) OR "mTOR"[All Fields]) AND ("ovarian cysts"[All Fields] OR "ovarian cyst"[All Fields])) AND ((humans[Filter]) AND (english[Filter])) AND (("1990/01/01"[PDAT]: "2020/03/31"[PDAT]))

### EMBASE

('tacrolimus'/exp OR tacrolimus OR 'sirolimus'/exp OR sirolimus OR 'everolimus'/exp OR everolimus OR 'deforolimus'/exp OR deforolimus OR 'mtor'/exp OR mtor) AND ('ovarian cysts'/exp OR 'ovarian cysts' OR 'ovarian cyst'/exp OR 'ovarian cyst') AND [article]/lim AND [humans]/lim AND [english]/lim AND [embase]/lim AND (1990:py OR 1991:py OR 1992:py OR 1993:py OR 1994:py OR 1995:py OR 1996:py OR 1997:py OR 1998:py OR 1999:py OR 2000:py OR 2001:py OR 2002:py OR 2003:py OR 2004:py OR 2005:py OR 2006:py OR 2007:py OR 2008:py OR 2009:py OR 2010:py OR 2011:py OR 2012:py OR 2013:py OR 2014:py OR 2015:py OR 2016:py OR 2017:py OR 2018:py OR 2019:py OR 2020:py)
